# Supplementary material
Source: ML conference proceedings conference paper supplement (https://openreview.net/forum?id=x3cFAoorct)
Supplement: supplementary_material [file attachment]

## MNIST Multi-digit Sum LFL-Type1 test

original MNIST label
