# Supplementary material
Source: ML conference proceedings conference paper supplement (https://openreview.net/forum?id=x3cFAoorct)
Supplement: supplementary_material [file attachment]

### MNIST-Sum LFL-Type1 test

| original MNIST label | 0    | 1   | 2   | 3   | 4   | 5    | 6    | 7   | 8   | 9    |
|----------------------|------|-----|-----|-----|-----|------|------|-----|-----|------|
| 0                    | 1    | 1   | 1   | 0   | 0   | 1    | 0    | 0   | 976 | 0    |
| 1                    | 1132 | 0   | 0   | 0   | 0   | 2    | 0    | 0   | 0   | 1    |
| 2                    | 0    | 1   | 0   | 2   | 0   | 6    | 1020 | 0   | 0   | 3    |
| 3                    | 0    | 1   | 0   | 0   | 6   | 0    | 0    | 0   | 0   | 1003 |
| 4                    | 0    | 0   | 2   | 978 | 0   | 0    | 1    | 1   | 0   | 0    |
| 5                    | 0    | 0   | 1   | 0   | 889 | 0    | 0    | 0   | 0   | 2    |
| 6                    | 1    | 1   | 949 | 3   | 1   | 0    | 0    | 0   | 2   | 1    |
| 7                    | 2    | 1   | 0   | 1   | 0   | 1020 | 2    | 1   | 0   | 1    |
| 8                    | 0    | 964 | 0   | 0   | 4   | 0    | 1    | 1   | 1   | 3    |
| 9                    | 0    | 1   | 0   | 9   | 5   | 3    | 0    | 989 | 1   | 1    |
