# Supplementary material
Source: ML conference proceedings conference paper supplement (https://openreview.net/forum?id=x3cFAoorct)
Supplement: supplementary_material [file attachment]

## MNIST Multi-digit Sum LFL-Type3-MLP test

| original MNIST label | 0   | 1   | 2    | 3    | 4    | 5   | 6    | 7   | 8   | 9   |
|----------------------|-----|-----|------|------|------|-----|------|-----|-----|-----|
| 0                    | 0   | 0   | 1    | 0    | 0    | 0   | 1    | 0   | 0   | 978 |
| 1                    | 1   | 0   | 0    | 1132 | 1    | 1   | 0    | 0   | 0   | 0   |
| 2                    | 0   | 0   | 1026 | 1    | 1    | 1   | 2    | 0   | 1   | 0   |
| 3                    | 3   | 0   | 1    | 0    | 1005 | 1   | 0    | 0   | 0   | 0   |
| 4                    | 0   | 3   | 0    | 0    | 0    | 1   | 0    | 978 | 0   | 0   |
| 5                    | 882 | 1   | 0    | 0    | 7    | 1   | 0    | 0   | 1   | 0   |
| 6                    | 3   | 0   | 0    | 2    | 0    | 0   | 0    | 2   | 949 | 2   |
| 7                    | 0   | 2   | 4    | 3    | 0    | 1   | 1018 | 0   | 0   | 0   |
| 8                    | 1   | 2   | 2    | 0    | 1    | 966 | 0    | 0   | 1   | 1   |
| 9                    | 2   | 994 | 0    | 0    | 0    | 3   | 3    | 6   | 0   | 1   |
