# Supplementary material
Source: ML conference proceedings conference paper supplement (https://openreview.net/forum?id=x3cFAoorct)
Supplement: supplementary_material [file attachment]

# MNIST Multi-digit Sum LFL-Type3-MLP train

| original MNIST label | 0    | 1    | 2    | 3    | 4    | 5    | 6    | 7    | 8    | 9    |
|----------------------|------|------|------|------|------|------|------|------|------|------|
| 0                    | 0    | 0    | 0    | 0    | 0    | 0    | 0    | 0    | 0    | 5923 |
| 1                    | 0    | 0    | 0    | 6742 | 0    | 0    | 0    | 0    | 0    | 0    |
| 2                    | 0    | 0    | 5958 | 0    | 0    | 0    | 0    | 0    | 0    | 0    |
| 3                    | 0    | 1    | 0    | 0    | 6130 | 0    | 0    | 0    | 0    | 0    |
| 4                    | 0    | 0    | 0    | 1    | 0    | 0    | 1    | 5840 | 0    | 0    |
| 5                    | 5420 | 0    | 0    | 0    | 1    | 0    | 0    | 0    | 0    | 0    |
| 6                    | 0    | 0    | 0    | 0    | 0    | 0    | 0    | 0    | 5918 | 0    |
| 7                    | 0    | 0    | 0    | 1    | 0    | 0    | 6264 | 0    | 0    | 0    |
| 8                    | 0    | 0    | 0    | 0    | 0    | 5851 | 0    | 0    | 0    | 0    |
| 9                    | 0    | 5948 | 0    | 0    | 0    | 0    | 1    | 0    | 0    | 0    |
