# Supplementary material
Source: ML conference proceedings conference paper supplement (https://openreview.net/forum?id=x3cFAoorct)
Supplement: supplementary_material [file attachment]

## MNIST-Sum LFL-Type1 train

| original MNIST label | 0    | 1    | 2    | 3    | 4    | 5    | 6    | 7    | 8    | 9    |
|----------------------|------|------|------|------|------|------|------|------|------|------|
| 0                    | 0    | 0    | 3    | 0    | 0    | 0    | 0    | 2    | 5918 | 0    |
| 1                    | 6736 | 0    | 1    | 1    | 0    | 4    | 0    | 0    | 0    | 0    |
| 2                    | 2    | 1    | 1    | 0    | 0    | 3    | 5945 | 0    | 0    | 6    |
| 3                    | 0    | 0    | 0    | 0    | 12   | 0    | 0    | 1    | 0    | 6118 |
| 4                    | 1    | 0    | 0    | 5836 | 0    | 1    | 0    | 4    | 0    | 0    |
| 5                    | 0    | 0    | 3    | 0    | 5415 | 0    | 0    | 0    | 0    | 3    |
| 6                    | 0    | 0    | 5916 | 0    | 0    | 0    | 1    | 0    | 1    | 0    |
| 7                    | 4    | 1    | 0    | 1    | 0    | 6254 | 2    | 2    | 1    | 0    |
| 8                    | 2    | 5838 | 5    | 0    | 5    | 0    | 0    | 0    | 0    | 1    |
| 9                    | 1    | 2    | 0    | 12   | 1    | 2    | 0    | 5929 | 0    | 2    |
