# Supplementary material
Source: ML conference proceedings conference paper supplement (https://openreview.net/forum?id=x3cFAoorct)
Supplement: supplementary_material [file attachment]

# MNIST-Sum LFL-Type1 no label distribution loss train

|                      |   |      |      |      |      |      |      |      |      |   |      |
|----------------------|---|------|------|------|------|------|------|------|------|---|------|
| original MNIST label | 0 | 0    | 0    | 0    | 0    | 0    | 0    | 0    | 5923 | 0 |      |
|                      | 1 | 24   | 6710 | 0    | 0    | 8    | 0    | 0    | 0    | 0 |      |
|                      | 2 | 5956 | 0    | 0    | 0    | 2    | 0    | 0    | 0    | 0 |      |
|                      | 3 | 5    | 0    | 0    | 0    | 0    | 6120 | 2    | 1    | 0 | 3    |
|                      | 4 | 0    | 3    | 0    | 5836 | 1    | 0    | 0    | 2    | 0 | 0    |
|                      | 5 | 0    | 0    | 0    | 0    | 0    | 5    | 5414 | 0    | 2 | 0    |
|                      | 6 | 1    | 1    | 5906 | 3    | 0    | 0    | 1    | 0    | 5 | 1    |
|                      | 7 | 14   | 10   | 0    | 0    | 6239 | 2    | 0    | 0    | 0 | 0    |
|                      | 8 | 12   | 3    | 1    | 0    | 1    | 3    | 5    | 0    | 0 | 5826 |
|                      | 9 | 0    | 0    | 0    | 18   | 4    | 9    | 9    | 5903 | 4 | 2    |
|                      | 0 | 1    | 2    | 3    | 4    | 5    | 6    | 7    | 8    | 9 |      |
| predicted label      |   |      |      |      |      |      |      |      |      |   |      |
