# Supplementary material
Source: ML conference proceedings conference paper supplement (https://openreview.net/forum?id=x3cFAoorct)
Supplement: supplementary_material [file attachment]

## MNIST Multi-digit Sum LFL-Type1 no MLP test

| original MNIST label | 0   | 1 | 2 | 3 | 4 | 5   | 6   | 7 | 8 | 9 |
|----------------------|-----|---|---|---|---|-----|-----|---|---|---|
| 0                    | 529 | 0 | 0 | 0 | 0 | 341 | 109 | 0 | 0 | 1 |
| 1                    | 198 | 0 | 0 | 0 | 0 | 353 | 584 | 0 | 0 | 0 |
| 2                    | 300 | 0 | 0 | 0 | 0 | 659 | 73  | 0 | 0 | 0 |
| 3                    | 587 | 0 | 0 | 0 | 0 | 312 | 111 | 0 | 0 | 0 |
| 4                    | 103 | 0 | 0 | 0 | 0 | 696 | 183 | 0 | 0 | 0 |
| 5                    | 127 | 0 | 0 | 0 | 0 | 455 | 310 | 0 | 0 | 0 |
| 6                    | 412 | 0 | 0 | 0 | 0 | 459 | 87  | 0 | 0 | 0 |
| 7                    | 95  | 0 | 0 | 0 | 0 | 493 | 440 | 0 | 0 | 0 |
| 8                    | 101 | 0 | 0 | 0 | 0 | 509 | 364 | 0 | 0 | 0 |
| 9                    | 139 | 0 | 0 | 0 | 0 | 587 | 283 | 0 | 0 | 0 |
