# Supplementary material
Source: ML conference proceedings conference paper supplement (https://openreview.net/forum?id=x3cFAoorct)
Supplement: supplementary_material [file attachment]

## MNIST-Sum DSL train

| original MNIST label \ predicted label | 0    | 1    | 2    | 3    | 4    | 5    | 6    | 7    | 8    | 9    |
|----------------------------------------|------|------|------|------|------|------|------|------|------|------|
| 0                                      | 0    | 0    | 0    | 0    | 0    | 5915 | 0    | 5    | 0    | 3    |
| 1                                      | 0    | 0    | 2    | 0    | 0    | 0    | 0    | 6740 | 0    | 0    |
| 2                                      | 1    | 5890 | 19   | 6    | 0    | 2    | 0    | 31   | 1    | 8    |
| 3                                      | 0    | 2    | 8    | 5    | 2    | 2    | 3    | 6    | 6102 | 1    |
| 4                                      | 5818 | 0    | 2    | 0    | 0    | 2    | 5    | 14   | 0    | 1    |
| 5                                      | 0    | 1    | 0    | 5    | 5384 | 5    | 2    | 5    | 3    | 16   |
| 6                                      | 3    | 0    | 0    | 2    | 0    | 3    | 0    | 7    | 0    | 5903 |
| 7                                      | 4    | 0    | 6205 | 1    | 0    | 0    | 8    | 47   | 0    | 0    |
| 8                                      | 2    | 0    | 0    | 5792 | 1    | 4    | 5    | 37   | 2    | 8    |
| 9                                      | 10   | 0    | 7    | 2    | 1    | 5    | 5908 | 15   | 0    | 1    |
