# Supplementary material
Source: ML conference proceedings conference paper supplement (https://openreview.net/forum?id=x3cFAoorct)
Supplement: supplementary_material [file attachment]

MNIST Multi-digit Sum LFL-Type1 no MLP train

| original MNIST label |      |   |   |   |   |      |      |   |   |    |
|----------------------|------|---|---|---|---|------|------|---|---|----|
|                      | 0    | 1 | 2 | 3 | 4 | 5    | 6    | 7 | 8 | 9  |
| 0                    | 3201 | 0 | 0 | 0 | 0 | 1997 | 705  | 0 | 0 | 20 |
| 1                    | 1020 | 0 | 0 | 0 | 0 | 2410 | 3312 | 0 | 0 | 0  |
| 2                    | 1807 | 0 | 0 | 0 | 0 | 3539 | 611  | 0 | 0 | 1  |
| 3                    | 3256 | 0 | 0 | 0 | 0 | 2118 | 757  | 0 | 0 | 0  |
| 4                    | 620  | 0 | 0 | 0 | 0 | 4187 | 1035 | 0 | 0 | 0  |
| 5                    | 835  | 0 | 0 | 0 | 0 | 2711 | 1874 | 0 | 0 | 1  |
| 6                    | 2673 | 0 | 0 | 0 | 0 | 2364 | 881  | 0 | 0 | 0  |
| 7                    | 747  | 0 | 0 | 0 | 0 | 2660 | 2858 | 0 | 0 | 0  |
| 8                    | 597  | 0 | 0 | 0 | 0 | 2576 | 2678 | 0 | 0 | 0  |
| 9                    | 734  | 0 | 0 | 0 | 0 | 3371 | 1844 | 0 | 0 | 0  |
