# Supplementary material
Source: ML conference proceedings conference paper supplement (https://openreview.net/forum?id=x3cFAoorct)
Supplement: supplementary_material [file attachment]

## MNIST-Sum LFL-Type2 train

| original MNIST label | 0    | 1    | 2    | 3    | 4    | 5    | 6    | 7    | 8    | 9    |
|----------------------|------|------|------|------|------|------|------|------|------|------|
| 0                    | 0    | 1    | 1    | 0    | 0    | 5920 | 1    | 0    | 0    | 0    |
| 1                    | 0    | 6739 | 0    | 0    | 0    | 0    | 0    | 0    | 3    | 0    |
| 2                    | 0    | 12   | 5927 | 1    | 0    | 3    | 1    | 4    | 10   | 0    |
| 3                    | 0    | 1    | 2    | 6114 | 3    | 1    | 0    | 3    | 4    | 3    |
| 4                    | 5822 | 8    | 0    | 0    | 0    | 2    | 0    | 0    | 1    | 9    |
| 5                    | 0    | 1    | 1    | 8    | 5403 | 1    | 5    | 1    | 0    | 1    |
| 6                    | 2    | 2    | 0    | 0    | 0    | 7    | 5907 | 0    | 0    | 0    |
| 7                    | 1    | 22   | 2    | 0    | 0    | 0    | 0    | 0    | 6238 | 2    |
| 8                    | 1    | 9    | 0    | 4    | 4    | 7    | 2    | 5815 | 0    | 9    |
| 9                    | 6    | 6    | 0    | 3    | 5    | 8    | 0    | 2    | 7    | 5912 |
