# Supplementary material
Source: ML conference proceedings conference paper supplement (https://openreview.net/forum?id=x3cFAoorct)
Supplement: supplementary_material [file attachment]

## MNIST Multi-digit Sum LFL-Type3 test

| original MNIST label | 0   | 1   | 2    | 3    | 4   | 5   | 6    | 7   | 8    | 9   |
|----------------------|-----|-----|------|------|-----|-----|------|-----|------|-----|
| 0                    | 1   | 0   | 0    | 1    | 1   | 974 | 2    | 1   | 0    | 0   |
| 1                    | 1   | 0   | 1    | 1129 | 1   | 1   | 0    | 0   | 2    | 0   |
| 2                    | 2   | 1   | 1018 | 0    | 0   | 2   | 3    | 2   | 4    | 0   |
| 3                    | 1   | 0   | 2    | 0    | 3   | 0   | 1    | 1   | 1002 | 0   |
| 4                    | 977 | 0   | 0    | 1    | 0   | 0   | 0    | 1   | 0    | 3   |
| 5                    | 0   | 1   | 1    | 0    | 878 | 2   | 0    | 1   | 7    | 2   |
| 6                    | 2   | 946 | 0    | 2    | 4   | 4   | 0    | 0   | 0    | 0   |
| 7                    | 0   | 0   | 3    | 2    | 1   | 0   | 1018 | 1   | 1    | 2   |
| 8                    | 0   | 0   | 1    | 0    | 3   | 0   | 0    | 964 | 5    | 1   |
| 9                    | 14  | 0   | 1    | 0    | 2   | 0   | 6    | 8   | 0    | 978 |
