# Supplementary material
Source: ML conference proceedings conference paper supplement (https://openreview.net/forum?id=x3cFAoorct)
Supplement: supplementary_material [file attachment]

### MNIST-Sum LFL-Type3 test

| original MNIST label | 0   | 1    | 2   | 3   | 4    | 5   | 6   | 7   | 8   | 9   |
|----------------------|-----|------|-----|-----|------|-----|-----|-----|-----|-----|
| 0                    | 0   | 1    | 0   | 0   | 0    | 0   | 0   | 978 | 1   | 0   |
| 1                    | 0   | 1135 | 0   | 0   | 0    | 0   | 0   | 0   | 0   | 0   |
| 2                    | 0   | 2    | 0   | 1   | 1027 | 0   | 0   | 1   | 0   | 1   |
| 3                    | 0   | 1    | 6   | 0   | 5    | 996 | 1   | 1   | 0   | 0   |
| 4                    | 2   | 0    | 0   | 0   | 0    | 0   | 0   | 0   | 1   | 979 |
| 5                    | 0   | 0    | 888 | 0   | 0    | 2   | 0   | 1   | 1   | 0   |
| 6                    | 0   | 2    | 1   | 0   | 0    | 0   | 0   | 4   | 950 | 1   |
| 7                    | 0   | 16   | 0   | 997 | 11   | 1   | 0   | 2   | 0   | 1   |
| 8                    | 4   | 2    | 1   | 0   | 2    | 0   | 958 | 5   | 1   | 1   |
| 9                    | 995 | 0    | 2   | 1   | 0    | 0   | 1   | 0   | 0   | 10  |
