# Supplementary material
Source: ML conference proceedings conference paper supplement (https://openreview.net/forum?id=x3cFAoorct)
Supplement: supplementary_material [file attachment]

MNIST-Sum LFL-Type3 train

| original MNIST label |      |      |      |      |      |      |      |      |      |      |
|----------------------|------|------|------|------|------|------|------|------|------|------|
|                      | 0    | 1    | 2    | 3    | 4    | 5    | 6    | 7    | 8    | 9    |
| 0                    | 0    | 2    | 0    | 0    | 0    | 0    | 0    | 5917 | 4    | 0    |
| 1                    | 0    | 6741 | 0    | 1    | 0    | 0    | 0    | 0    | 0    | 0    |
| 2                    | 0    | 2    | 0    | 0    | 5953 | 0    | 0    | 1    | 2    | 0    |
| 3                    | 1    | 3    | 11   | 0    | 38   | 6075 | 0    | 3    | 0    | 0    |
| 4                    | 0    | 2    | 0    | 1    | 0    | 0    | 0    | 0    | 0    | 5839 |
| 5                    | 0    | 2    | 5402 | 0    | 0    | 2    | 1    | 0    | 14   | 0    |
| 6                    | 0    | 2    | 0    | 0    | 0    | 0    | 0    | 1    | 5912 | 3    |
| 7                    | 2    | 66   | 1    | 6162 | 32   | 0    | 0    | 0    | 0    | 2    |
| 8                    | 2    | 14   | 1    | 0    | 8    | 0    | 5813 | 5    | 7    | 1    |
| 9                    | 5925 | 2    | 0    | 1    | 0    | 0    | 0    | 1    | 0    | 20   |
