# Supplementary material
Source: ML conference proceedings conference paper supplement (https://openreview.net/forum?id=x3cFAoorct)

Comparing DSL and LFL-Type2/3 on training mode accuracy

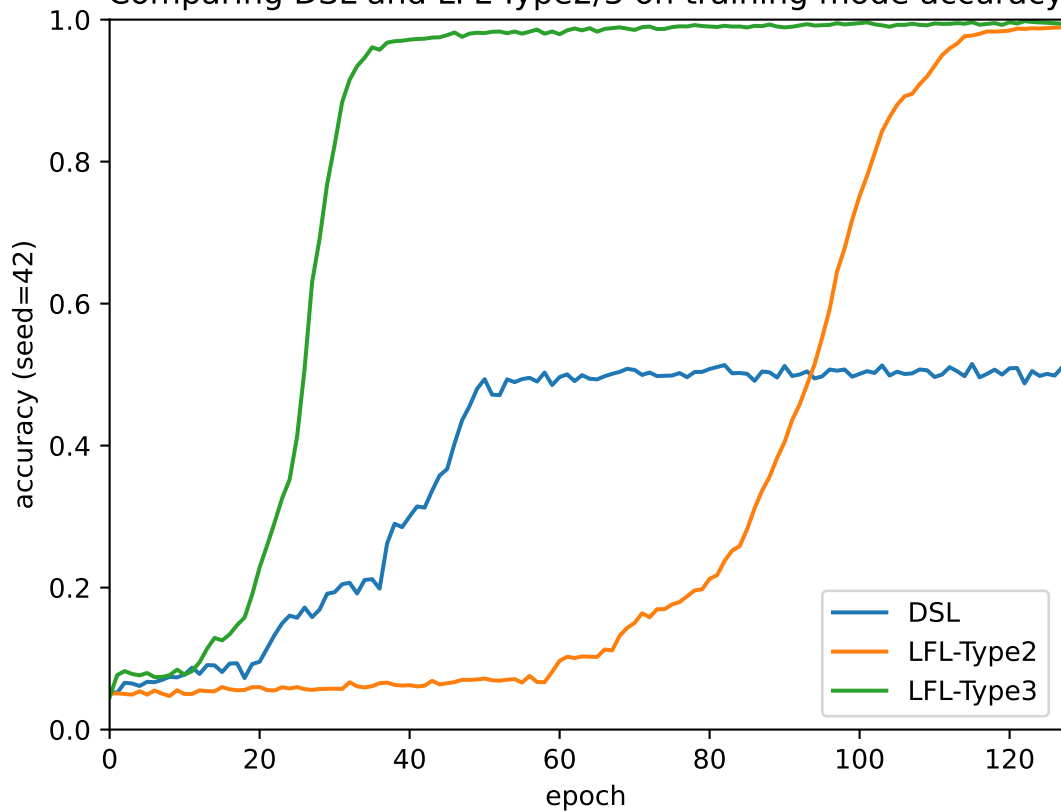

Supplement: supplementary_material [file attachment]

Comparing dNL and LFL-Type1 on binary single-digit sum

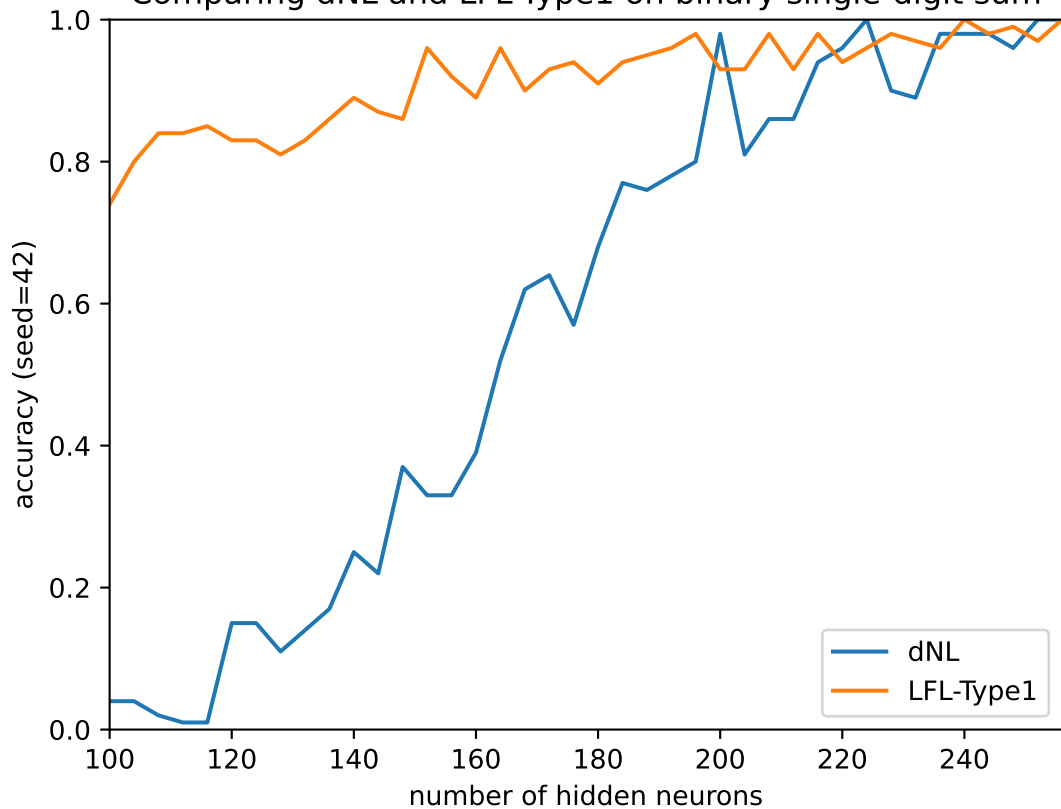

Supplement: supplementary_material [file attachment]
